# Supplementary material for: Steroid Receptor Coactivator-2 Controls the Pentose Phosphate Pathway through RPIA in Human Endometrial Cancer Cells
Source: PubMed Central journal article supplement (PMC6120906; doi:10.1038/s41598-018-31372-y), 2018-09-03
Supplement: 41598_2018_31372_MOESM1_ESM.pdf [file 41598_2018_31372_MOESM1_ESM.pdf]

# **SUPPLEMENTAL FIGURES AND TABLES**

**accompanying the manuscript:**

## **Steroid Receptor Coactivator-2 Controls the Pentose Phosphate Pathway through RPIA in Human Endometrial Cancer Cells**

Maria M. Szwarc<sup>1</sup>, Ramakrishna Kommagani<sup>2</sup>, Vasanta Putluri<sup>1,3</sup>, Julien Dubrulle<sup>1,3</sup>, Fabio Stossi<sup>1,3</sup>, Michael A. Mancini<sup>1,3</sup>, Cristian Coarfa<sup>1</sup>, Rainer B. Lanz<sup>1</sup>, Nagireddy Putluri<sup>1,3</sup>, Francesco J. DeMayo<sup>4</sup>, John P. Lydon<sup>1\*\*</sup>, and Bert W. O'Malley<sup>1\*</sup>

<sup>1</sup>Department of Molecular & Cellular Biology, Baylor College of Medicine, Houston, Texas;

<sup>2</sup>Department of Obstetrics & Gynecology, Washington University School of Medicine, St. Louis, MO;

<sup>3</sup>Advanced Technology Cores, Dan L. Duncan Comprehensive Cancer Center, Baylor College of Medicine, Houston, Texas;

<sup>4</sup>Reproductive and Developmental Biology Laboratory, National Institute of Environmental Health Sciences, Research Triangle Park, North Carolina

**Supplemental Figure S1. Uncropped Western blot images and additional exposures for Figure 1A**

**Supplemental Figure S2. Lack of compensation effect after SRC-1 or SRC-3 knockdown by other SRCs**

DNA content-based proliferation assay performed on Ishikawa cells after double combinational knockdowns of SRCs measured over 3 days indicate that only SRC-2 downregulation causes a reduction in cell proliferation. No compensation by the other SRC underlies the lack of phenotype seen when SRC-1 and SRC-3 are downregulated.

**Supplemental Figure S3. Expression of PFKFBs following SRC-2 knockdown**

(A) RT-qPCR analysis of PFKFB3 and (B) PFKFB4 expression levels in Ishikawa cells after SRC-2 knockdown.

**Supplemental Figure S4. No changes in RNA synthesis following SRC-2 and RPIA downregulation**

Measurements of *de novo* RNA synthesis expressed as sum of pixel intensity per cell of fluorescently labeled incorporated EU.

**Supplemental Figure S5. Increase in levels of apoptosis, measured in caspase-3 and caspase-7 activation, in Ishikawa cells with decreased SRC-2 or RPIA levels**

**Supplemental Figure S6. Reduction of glycolytic flux is not caused by downregulation of expression of glycolytic enzymes**

RT-qPCR analysis of gene expression of key glycolytic enzymes

**Supplemental Figure S7. Glycolysis and PPP cross-talk delineation with 1-<sup>13</sup>C-glucose and 6-<sup>13</sup>C-glucose tracking approach**

Schematic representation of glycolysis and the PPP with <sup>13</sup>C marked as a red circle in cells treated with (A) 6-<sup>13</sup>C-glucose or (B) 1-<sup>13</sup>C-glucose.

**Supplemental Table ST1. List of Taqman Gene Expression Assays**

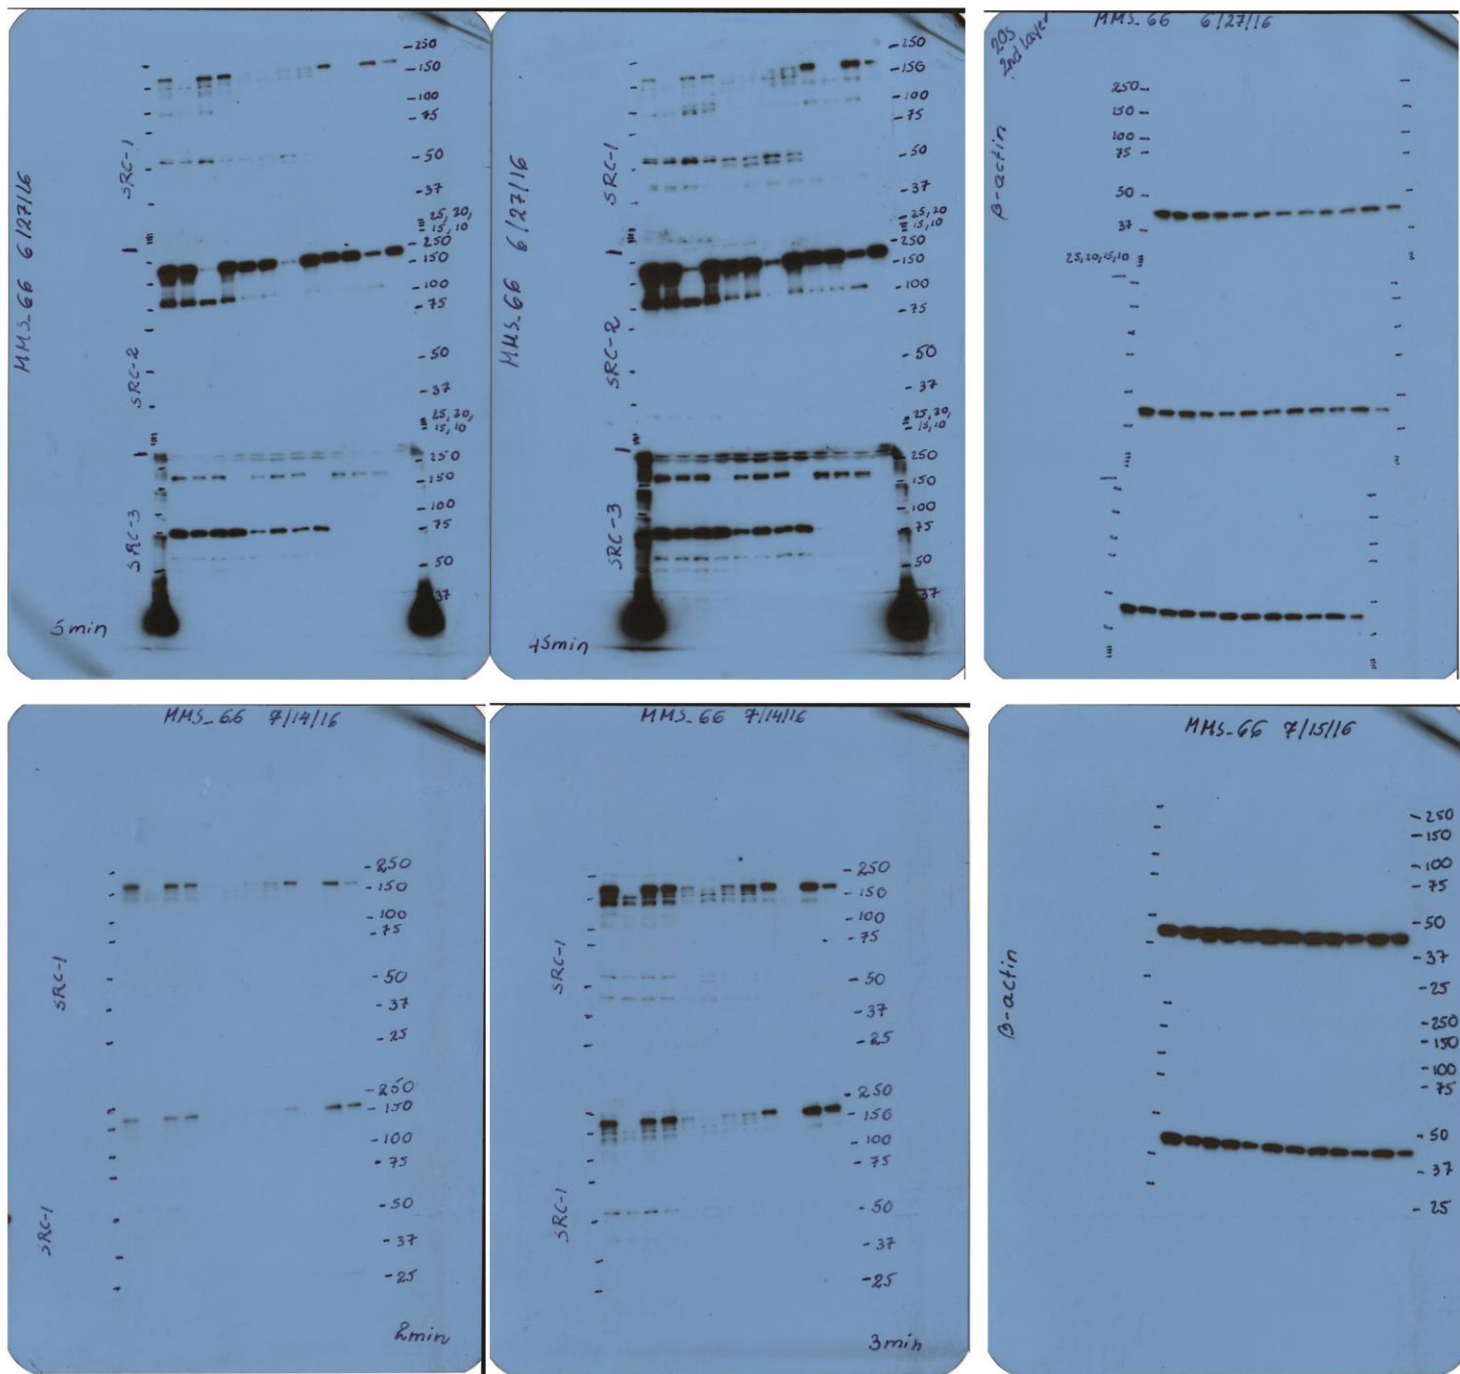

Supplemental Figure S1

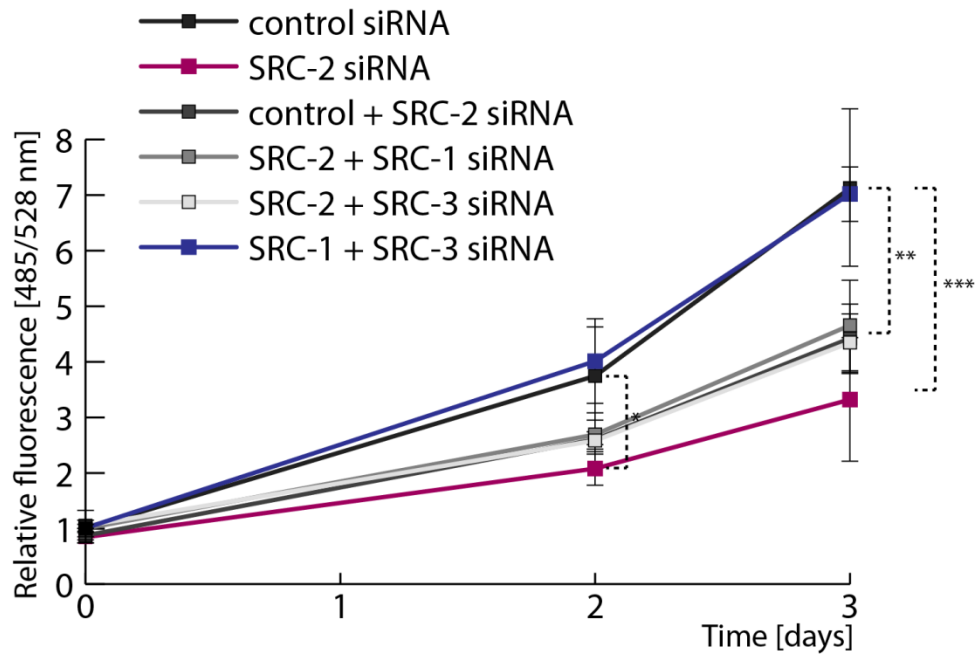

Supplemental Figure S2

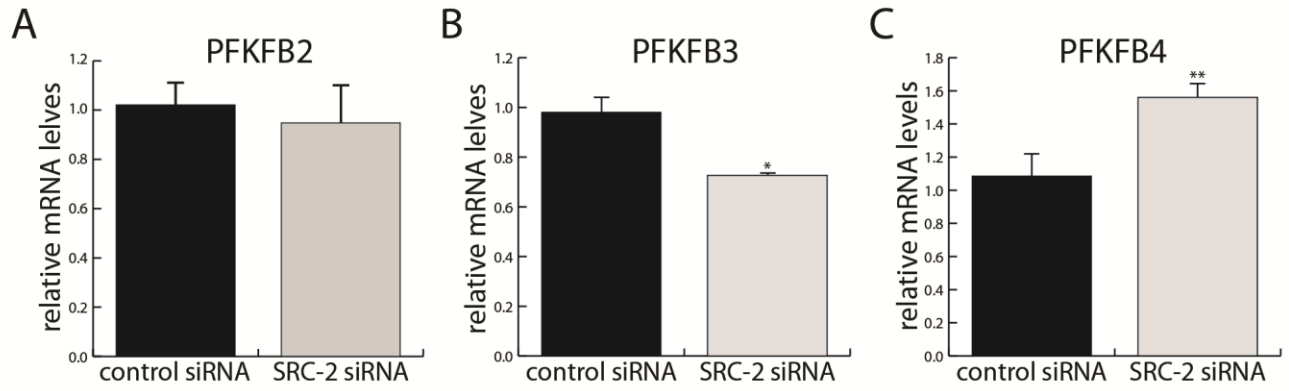

Supplemental Figure S3

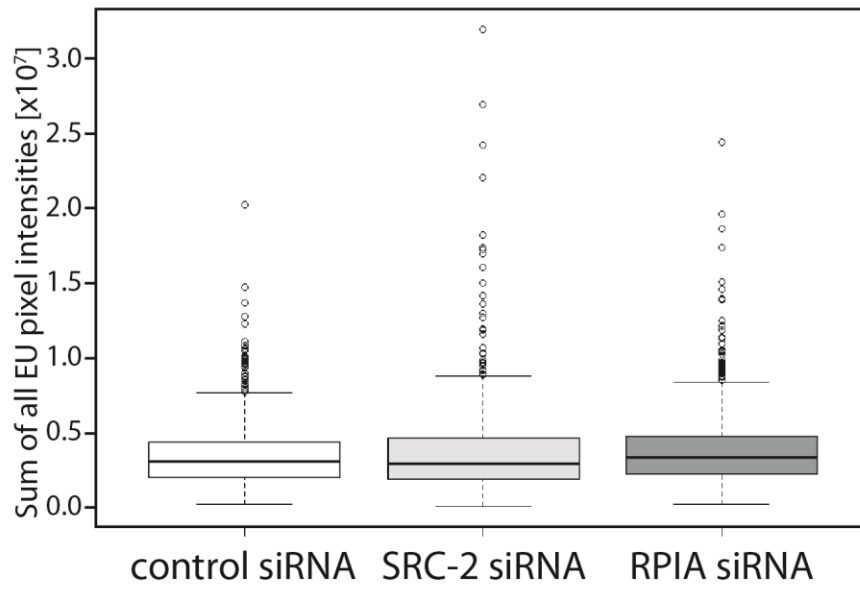

Supplemental Figure S4

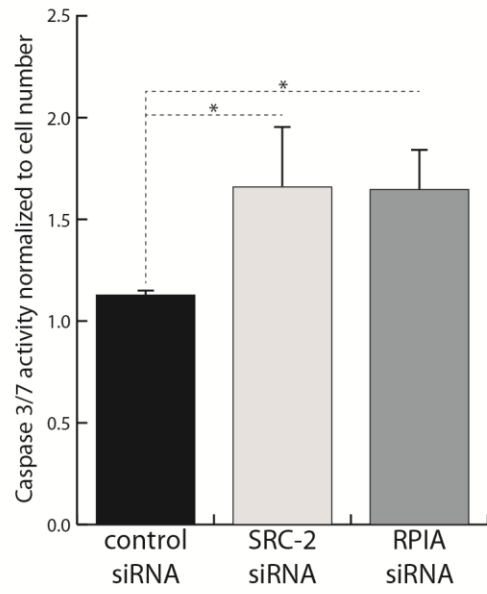

Supplemental Figure S5



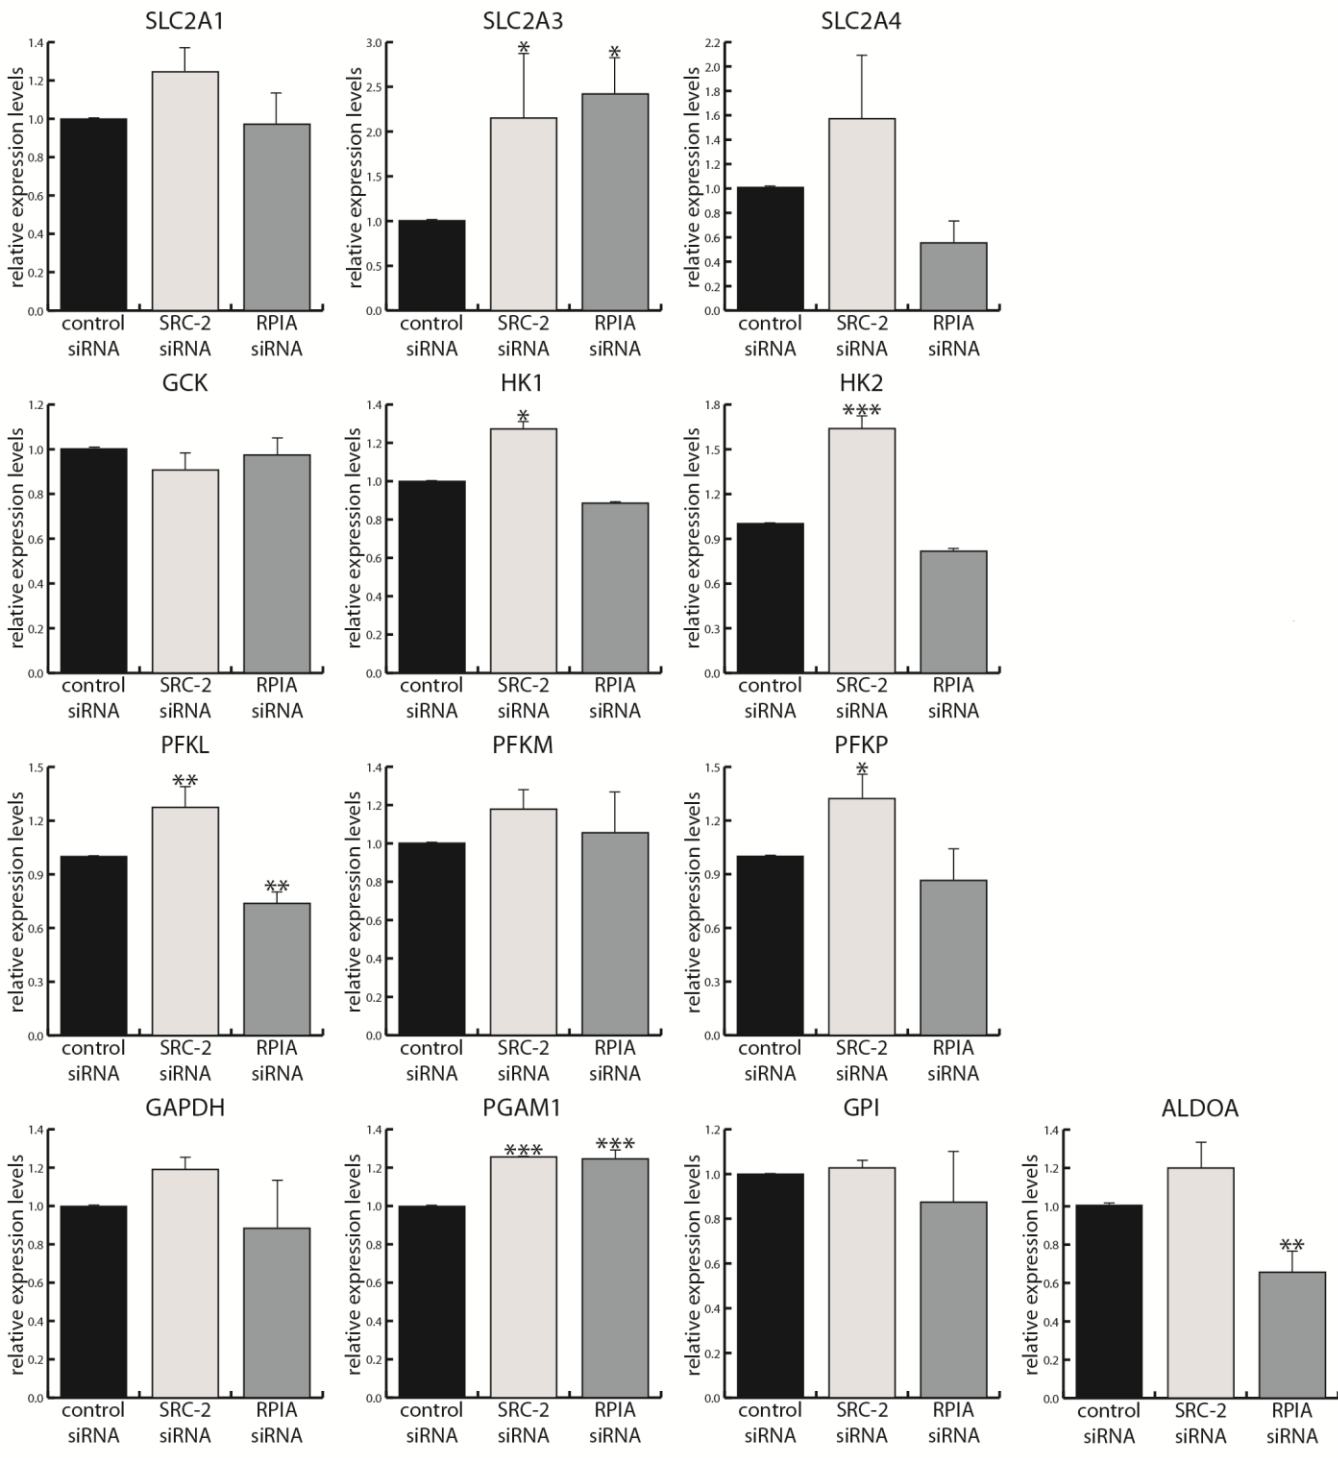

Supplemental Figure S6

A

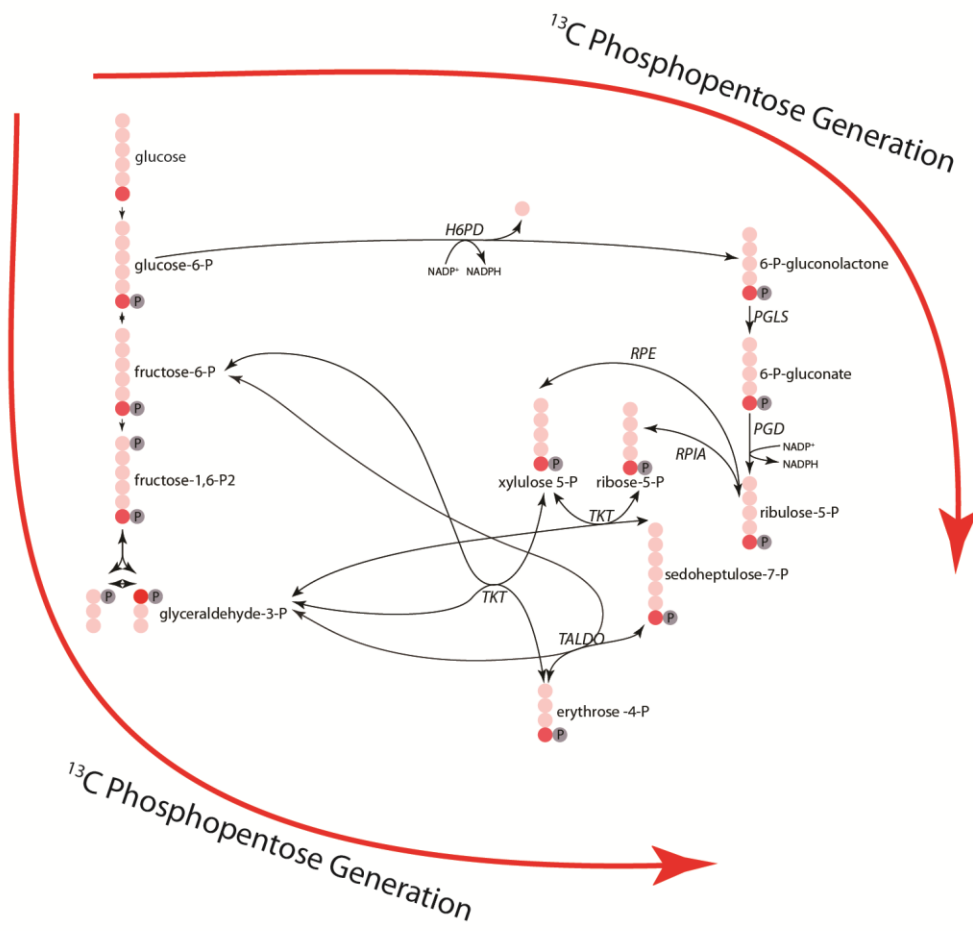

B

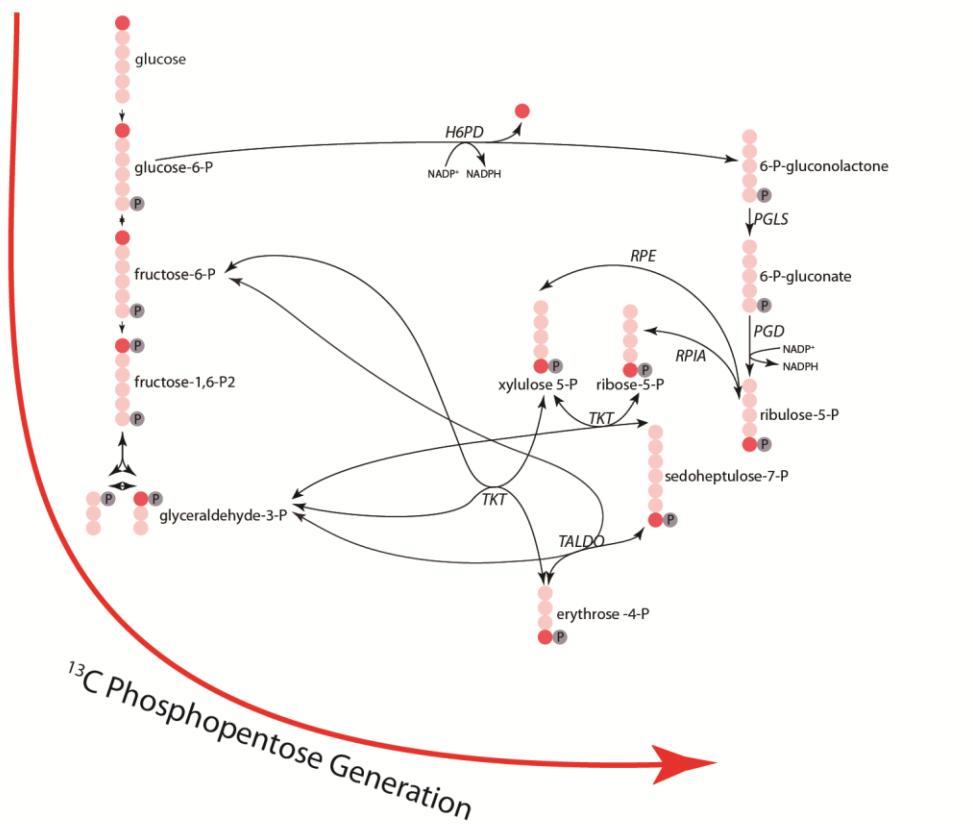

Supplemental Figure S7

|          | Applied Biosystems Taqman<br>Gene Expression Assay |
|----------|----------------------------------------------------|
| 18S rRNA | 4319413E                                           |
| ALDOA    | Hs00605108_g1                                      |
| ALDOB    | Hs01551887_m1                                      |
| GAPDH    | Hs02758991_g1                                      |
| GCK      | Hs01564555_m1                                      |
| GPI      | Hs00976715_m1                                      |
| H6PD     | Hs00188728_m1                                      |
| HK1      | Hs00175976_m1                                      |
| HK2      | Hs00606086_m1                                      |
| PFKFB2   | Hs01015408_m1                                      |
| PFKFB3   | Hs00998700_m1                                      |
| PFKFB4   | Hs00190096_m1                                      |
| PFKL     | Hs01040525_m1                                      |
| PFKM     | Hs00175997_m1                                      |
| PFKP     | Hs00242993_m1                                      |
| PGAM1    | Hs01652468_g1                                      |
| PGD      | Hs00427230_m1                                      |
| PGLS     | Hs00359986_m1                                      |
| RPE      | Hs00851816_g1                                      |
| RPIA     | Hs01107136_m1                                      |
| SLC2A1   | Hs00892681_m1                                      |
| SLC2A3   | Hs00359840_m1                                      |
| SLC2A4   | Hs00168966_m1                                      |
| TALDO    | Hs00997203_m1                                      |
| TKT      | Hs01115545_m1                                      |

## Supplemental Table ST1
